# Supplementary material
Source: PubMed Central journal article supplement (PMC3289750)
Supplement: NIHMS330673-supplement-5.pdf [file NIHMS330673-supplement-5.pdf]

normoxia; H, hypoxia; D1, Day 1 of culture; D2, Day 2; D3, Day 3, D5, Day 5. Values represent mean  $\pm$  SEM. Two-way ANOVA with Tukey-Kramer pair-wise comparison test.

**Figure 6.** Schematic summary of *ex vivo* organoid culture experiments. *a*) In the presence of R-spondin 1 and Noggin, addition of HB-EGF leads to increased crypt-villous organoid growth, with promotion of crypt fission and TA zone/villous domain expansion. *b*) In the presence of R-spondin 1 alone, R-spondin 1 plus Noggin, or R-spondin 1 plus Noggin plus HB-EGF in the presence of MEK 1/2 inhibition, crypt-villous organoid growth is limited to small spherical organoids. *c*) In the presence of Noggin alone, HB-EGF alone, or R-spondin 1 plus Noggin plus HB-EGF in the presence of either EGFR or PI3K inhibition, crypt-villous organoid growth is completely abolished. Thus, EGFR and PI3K activation are crucial, and MEK 1/2 activation is important, in HB-EGF-mediated crypt-villous organoid growth. ISCs, green; progenitor cells in TA zone, yellow; paneth cells, brown; enterocytes, blue; goblet cells, red. N, Noggin; RS, R-spondin 1.

## SUPPLEMENTARY VIDEOS AND FIGURES

**Supplementary Figure 1.** Low magnification microscopic images of anti-LGR5 and anti-prominin-1 double immunostaining of ISCs (white arrows) in the intervillous regions of uninjured breast-fed rat pups. ISCs were stained with: *a*) anti-LGR5 (FITC, green); *b*) anti-prominin-1 (Cy3, red); *c*) DAPI nuclear staining (blue); and *d*) merged image. The white dashed lines indicate the base of the mucosal epithelium.

**Supplementary Figure 2.** Human intestine resected for NEC has loss of ISC staining. Shown are representative photomicrographs of LGR 5 immunostaining of human intestine resected for: a) ileal atresia (gestational age 28 weeks, 10 days of life) and b) NEC (gestational age 28 weeks, 5 days of life). ISC are indicated by white arrows.

**Supplementary Figure 3.** HB-EGF protects purified ISCs from hypoxia. (A) Isolation of intervillous epithelia. Villi were separated from intervillous regions as described in Methods. (B) MACS isolation of ISCs. Prominin-1 antibody-conjugated magnetic bead purification was used to purify ISCs. Shown are representative photomicrographs of cells stained for: a, e) DAPI nuclear staining; b, f) LGR5; c, g) prominin-1; d, h) merged images. a-d represent MACS flow-through fractions; e-h represent MACS eluate fractions. (C) Flow cytometric analysis of MACS eluates. MACS-isolated cells were labeled with anti-prominin-1 or anti-LGR5 and analyzed by flow cytometry. Left panel: unstained cells (grey) and cells labeled with prominin-1 antibody (red), with secondary antibody conjugated with Cy3. Right panel, unstained cells (grey) and cells labeled with anti-LRG5 (green), with secondary antibody conjugated with FITC. ~80% of the MACS eluate fractions consist of cells that stain positively for prominin-1 and LGR5. (D) HB-EGF protects prominin-1<sup>+</sup> ISCs from hypoxia. ISC viability is represented as the % of viable ISCs exposed to normoxia in the absence of HB-EGF, which was arbitrarily designated as 100% viability. NA, medium containing R-spondin 1 and Noggin with no addition of HB-EGF; HB-EGF, medium containing R-spondin 1 and Noggin with HB-EGF (100 µg/ml). Values represent mean ± SEM. One-way ANOVA with Tukey-Kramer pair-wise comparison test.

**Supplementary Figure 4.** Schematic illustration of HB-EGF signaling in ISCs. The Wnt agonist R-spondin 1 promotes the canonical  $\beta$ -catenin pathway that leads to the expression of c-Myc, Cyclin-D1, growth factors, EGFR and LGR5. HB-EGF and other growth factors, via activation of

EGFR and other TRKs, may provide autocrine signaling that activates the important PI3K/AKT pathway that is complementary to  $\beta$ -catenin signaling. The BMP inhibitor Noggin suppresses PTEN and augments PI3K signaling, thus activating the  $\beta$ -catenin pathway. HB-EGF promotes ISC viability and proliferation through EGFR/PI3K and EGFR/MEK1/2 signalings. Abbreviations: *BMP*, bone morphogenic protein; *BMPR1A*, BMP receptor 1A; *CREB*, cAMP response element-binding protein; *EGFR*, epidermal growth factor receptor; *ETS*, E-twenty-six transcription factor; *FGF*, fibroblast growth factor; *GSK3 $\beta$* , glycogen synthesis kinase 3 $\beta$ ; *LRP*, low-density lipoprotein-receptor related protein; *PI3K*, phosphatidylinositol 3-kinase; *PTEN*, phosphatase and tensin homolog; *RTK*, receptor tyrosine kinase; *TCF*, T-cell factor; *VEGF*, vascular endothelial growth factor; *Wnt*, wingless.

**Supplementary Video 1.** 3D movie showing confocal reconstruction of intervillous ISCs. ISCs were stained with anti-LGR5 (FITC, green) and anti-prominin-1 (Cy3, red). DAPI, nuclear staining (blue).

**Supplementary Video 2.** Time lapse recordings of (A) a proliferative crypt forming an organoid (days 0-1) and (B) a degraded crypt cultured from days 1-3.
